# Supplementary material for: CaPUB1, a Hot Pepper U-box E3 Ubiquitin Ligase, Confers Enhanced Cold Stress Tolerance and Decreased Drought Stress Tolerance in Transgenic Rice (Oryza sativa L.)
Source: PubMed Central journal article supplement — Mol Cells. 2015 Dec 16;39(3):250–7. doi: 10.14348/molcells.2016.2290 (PMC4794607; doi:10.14348/molcells.2016.2290), 2015-12-16
Supplement: molce-39-3-250-supple.pdf [file molce-39-3-250-supple.pdf]

A

```

CaPUB1 : -----MEEIQVPEYFLCPISLEMMKDPVTIISGITYDRENIERWIFSAKN-----NCPVTK--QSLTSEIETLTPNVTLLRRFIQSWCT--LNASHGIERFPPTPKPPVSKAQLKLMKE--
OsPUB33 : -----MEEAAAEEVPSYFLCPISLEIMRDPVTIATGITYDRSSIERWMFGGCGDGGKCTCPVTRRCLAPAEREATPNHTLRRLIQAWCA----AAVEREPTPRPPVDSCRVAALVDEGT
OsPUB31 : --MAAMASAAAEVPSYFVCPISLQLMRDPVTITPTGISYDRAAIARWLAAPG----ARRTCPVTR--QPLEHGLELTPNHTLRRLIQSWAP--SVSPGSAVDEEVAALRPVSSDEVASLLS---
OsPUB32 : MEEQQQVEVEVEVPSYFVCPISLQIMRDPVTIIPGITYDRDGIERWILLTAG-----TCPLTK--CPVPDCEDETPNHTLRRLIQSWCA--IHAD--GVDLVETPKPEADRARVADLVSR--

CaPUB1 : -----AKSREMOMKSIINTLRSTASVNDANKRCMES--AG--AEFLASVVVIDSSDVLGEEG-----FMSTKDEALSIIYQLKISEDGTIRSLITSGNG-EFTSITRVMORG
OsPUB33 : TTMLGGGGRQRQIAALREIKATAAESDRNKRCVEATPGAVEFLVSVVQSHAAASTSASSDDDDLFDSVIDSPMSTSSPEEALGVLYSLKPEPTLRRVIGKRDNGVGFIDILASVLRFP
OsPUB31 : -----DAAAAGVGFRLRELAACEEDSRAMLESQGGVFDVLSRVVTSGS--ACSTAR-----BEAVGVIASLRLEQELICVSTRHG--NLASITAVLRSS
OsPUB32 : --LRAATSSAALLDALRELRDVAEESERNRKLAAVPGAVDVLAAVVVASCRDAKAAC-----DEALEIVCSLELSERCLARLVERNE--ELVDALVATLQRT

CaPUB1 : SYESRAYAVMLMKDMFE--STLPTLFSSLKKEFFACVVRVLRDEISQKATKASIQVLAHACPFGRNRVKAABAGAVRVLDLLDSS---EKRTCELMILLLDQICQSAEGRAELINHPG
OsPUB33 : SYRSRAYAAILLKAVTSAMP--ERLMAVSEELIVEVVRVSDGVSSKAVKAALEHYLCRCPWGRNRVKAABAGAVEALVELLLDEEGGRRRAEELAVVAIDHLCCEAGRSELVAHPA
OsPUB31 : NLQSRHAVQLVRTLADAVV--EAWVIGLNAELLAEVVGVRDRVSARATKASLHALAALCPYGRHRVKIVGAGAVEALVELLLDEP---ERRVCELAVLDRLGCTCAEGRAELVAHAA
OsPUB32 : NTTSRHAHALLEAVTAVMP--SNRLVSTPEEVFGAVQLLRVSSPATRAALEVIVGTTSWGRNRVKAADAGAVEVLVDMLLDGPV---ERRGCELAALDRMCCAEGRALVSHGA

CaPUB1 : GLAIVSKKILRVSKVCSERAIKLIHSISKFSSTQSVVQEMLSIGVVAKLCLVQLVD--CGSKAKDRARDILKIHAKAWRNSPCTPMNLLSSYEF--
OsPUB33 : GLAVVSKRAMRVSPAATBSAVRALHAVARNAAPEVLCQEMLAVGVVAKLLLVQLAD--CGERARARAREMLRANARVWKDSPCLQAHKASYPG--
OsPUB31 : GVAVVCKVLRVSEAAERAVRVIRSVARHAATPEVLCQEMAQCGVVKLCIATRSEQGVKTKKAHEVVKLHSRVWRASPCISPSFLALYPS--
OsPUB32 : GVAVVGRKVLRVSEVASEKAVRVIRSVARHAATAPEVVCQEMGTCVAVKLCVVAQSEQCERTRERARETLRLHARAWRNSPCLQPHLQALYPS

```

B

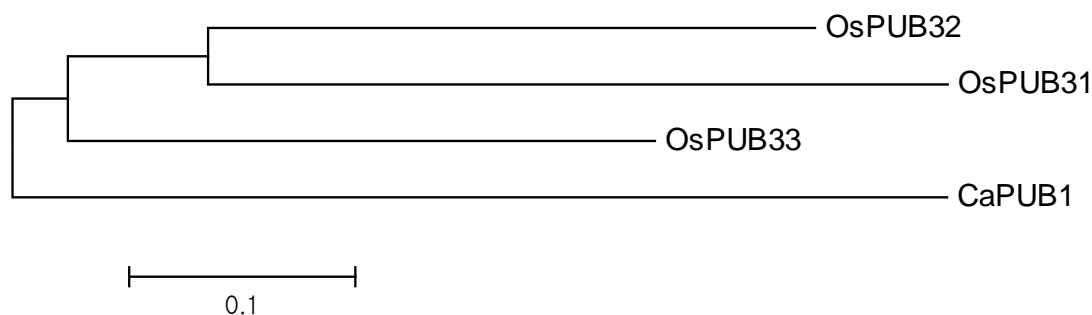

**Fig. S1.** Sequence analysis of hot pepper CaPUB1 and rice U-Box E3 Ub ligase homologs, OsPUB31, OsPUB32, and OsPUB33. (A) Comparison of the derived amino-acid sequences of CaPUB1 with those of rice OsPUB31, OsPUB32, and OsPUB33 U-box proteins. Amino-acid residues that are conserved in all four proteins are shown in black and amino-acids that are conserved at least three of the four sequences are shaded. (B) Phylogenetic relation of CaPUB1 and rice homologs. Phylogenetic tree was generated using MEGA6 software .
